# Supplementary material for: Quantification of Urinary Phenyl-γ-Valerolactones and Related Valeric Acids in Human Urine on Consumption of Apples
Source: PubMed Central journal article supplement (PMC6918130; doi:10.3390/metabo9110254), 2019-10-29
Supplement: metabolites-09-00254-s001.pdf [file metabolites-09-00254-s001.pdf]

# Quantification of urinary phenyl- $\gamma$ -valerolactones and related valeric acids in human urine after consumption of apples.

Andrea Anesi <sup>1</sup>, Pedro Mena <sup>2</sup>, Achim Bub <sup>3</sup>, Marynka M. Ulaszewska <sup>1</sup>, Daniele Del Rio <sup>4,5</sup>, Sabine E. Kulling <sup>6</sup> and Fulvio Mattivi <sup>1,7</sup>

<sup>1</sup> Department of Food Quality and Nutrition, Research and Innovation Centre, Fondazione Edmund Mach (FEM), Via Mach 1, 38010 San Michele all'Adige, TN, Italy;

<sup>2</sup> Human Nutrition Unit, Department of Food & Drug, University of Parma, Parma, Italy

<sup>3</sup> Department of Physiology and Biochemistry of Nutrition, Max Rubner-Institut, Karlsruhe, Germany

<sup>4</sup> School of Advanced Studies on Food and Nutrition, and Microbiome Research Hub, University of Parma, Parma, Italy

<sup>5</sup> Human Nutrition Unit, Department of Veterinary Medicine, University of Parma, Parma, Italy

<sup>6</sup> Department of Safety and Quality of Fruit and Vegetables, Max Rubner-Institut, Karlsruhe, Germany

<sup>7</sup> University of Trento, Department of Physics, Bioorganic Chemistry Laboratory, Via Sommarive 14, 38123 Povo, TN, Italy

\* Correspondence: fulvio.mattivi@unitn.it; Tel.: +39-0461-615-259 (F.M.)

## SUPPLEMENTARY MATERIAL

**Table S1.** Flavan-3-ol composition of study apples as determined by UHPLC-ESI-QqQ-MS/DAD following the procedure described in [35].

| Compound                                          | $\mu\text{mol in 400 g of Elstar apples}$ |
|---------------------------------------------------|-------------------------------------------|
| Free catechin                                     | 86.57 $\pm$ 4.68                          |
| Free epicatechin                                  | 688.85 $\pm$ 29.96                        |
| Free gallic catechin                              | 0.17 $\pm$ 0.03                           |
| Free epigallocatechin                             | 0.00 $\pm$ 0.00                           |
| Free catechin gallate                             | 0.18 $\pm$ 0.00                           |
| Catechin terminal units                           | 633.01 $\pm$ 35.64                        |
| Epicatechin, terminal units                       | 2262.56 $\pm$ 58.30                       |
| Gallic catechin, terminal units                   | 1.19 $\pm$ 0.20                           |
| Epigallocatechin, terminal units                  | 20.30 $\pm$ 2.83                          |
| Catechin gallate, terminal units                  | 1.46 $\pm$ 0.23                           |
| Catechin+epicatechin + phloroglucinol             | 14863.06 $\pm$ 615.46                     |
| Epigallocatechin + phloroglucinol                 | 450.69 $\pm$ 45.26                        |
| Epicatechin gallate + phloroglucinol              | 17.66 $\pm$ 4.57                          |
| Procyanidin B1                                    | 176.35 $\pm$ 11.90                        |
| Procyanidin B2                                    | 1882.18 $\pm$ 62.13                       |
| Total flavan-3-ol monomers                        | 563.04 $\pm$ 18.65                        |
| Total dimeric PACs                                | 2058.53 $\pm$ 55.28                       |
| Total oligomeric PACs (terminal + superior units) | 2922.50 $\pm$ 121.74                      |
| Total flavan-3-ols                                | 5756.81 $\pm$ 154.10                      |
| Mean degree of polymerization (mDP)               | 8.5 $\pm$ 0.11                            |

**Table S2.** Standard compounds used for PVL and PVA quantitation, their retention times, linearity range, curve equation and R<sup>2</sup>. The last column reports the detected compounds that were quantified using the specified calibration curve.

| Standard compound                                 | RT (min) | Range               | Equation       | R <sup>2</sup> | Curve used for the calibration of                                                                                                                                                                                                                                            |
|---------------------------------------------------|----------|---------------------|----------------|----------------|------------------------------------------------------------------------------------------------------------------------------------------------------------------------------------------------------------------------------------------------------------------------------|
| 5-phenyl- $\gamma$ -VL-3'-sulfate                 | 2.88     | 100 $\mu$ m – 10 nm | 46343.1x-111.7 | 0.997          |                                                                                                                                                                                                                                                                              |
| 5-phenyl- $\gamma$ -VL-3'-glucuronide             | 2.10     | 50 $\mu$ m – 100 nm | 2932.73x-159.2 | 0.994          | 5-phenyl- $\gamma$ -VL-methoxy-glucuronide                                                                                                                                                                                                                                   |
| 5-(5'-hydroxyphenyl)- $\gamma$ -VL-3'-sulfate     | 2.28     | 100 $\mu$ m – 50 nm | 20490.2x-397.5 | 0.997          |                                                                                                                                                                                                                                                                              |
| 5-(3'-hydroxyphenyl)- $\gamma$ -VL-4'-sulfate     | 2.66     | 100 $\mu$ m – 5 nm  | 36220.5x-67.3  | 0.994          | <ul style="list-style-type: none"> <li>• 5-phenyl-<math>\gamma</math>-VL-methoxy-sulfate (1, 2)</li> <li>• 5-phenyl-<math>\gamma</math>-VL-sulfate-glucuronide</li> <li>• 4-hydroxy-5-(hydroxyphenyl)-VA-sulfate</li> <li>• 4-hydroxy-5-phenyl-VA-methoxy sulfate</li> </ul> |
| 5-(5'-hydroxyphenyl)- $\gamma$ -VL-3'-glucuronide | 1.76     | 20 $\mu$ m – 50 nm  | 4154.85x+9.1   | 0.994          | <ul style="list-style-type: none"> <li>• 5-(hydroxyphenyl)-<math>\gamma</math>-VL-glucuronide (3',4' isomer)</li> <li>• 4-hydroxy-5-(hydroxyphenyl)-VA-glucuronide</li> </ul>                                                                                                |

**Table S3.** Quantification of selected PVLs and PVAs ( $\mu\text{mol}$ ) at different time points in urine of 11 study subjects

|            | <b>5-phenyl-<math>\gamma</math>-VL-3'-sulfate</b> |              |              |              |               |                |
|------------|---------------------------------------------------|--------------|--------------|--------------|---------------|----------------|
|            | <b>0-1 H</b>                                      | <b>1-2 H</b> | <b>2-4 H</b> | <b>4-6 H</b> | <b>6-12 H</b> | <b>12-24 H</b> |
| <b>S1</b>  | 0.001896                                          | 0.005282     | 0.000421     | 0.05835      | 2.006898      | 0.094276       |
| <b>S2</b>  | 0.03518                                           | 0.147459     | 0.602618     | 0.972602     | 4.36228       | 2.214342       |
| <b>S3</b>  | 0.02827                                           | 0.028659     | 0.017262     | 0.226868     | 0.873558      | 1.250919       |
| <b>S4</b>  | 0.004746                                          | 0.000032     | 3.462032     | 1.904976     | 2.936         | 2.538965       |
| <b>S5</b>  | 0.000528                                          | 0.000595     | 0.063616     | 1.083779     | 1.630233      | 0.17082        |
| <b>S6</b>  | 0.000258                                          | 0.001044     | 0.000494     | 0.09581      | 1.147661      | 5.777099       |
| <b>S7</b>  | 5.39E-05                                          | 0.000359     | 0.15984      | 0.223338     | 1.757376      | 1.168908       |
| <b>S8</b>  | 0.005938                                          | 0.000225     | 0.000685     | 0.010384     | 0.18391       | 0.355999       |
| <b>S9</b>  | 0.000292                                          | 0.004717     | 0.896566     | 0.974883     | 4.19083       | 2.539058       |
| <b>S10</b> | 0.131511                                          | 0.046062     | 0.117525     | 0.342695     | 12.90533      | 10.54295       |
| <b>S11</b> | 0.621251                                          | 0.85352      | 1.400177     | 4.855904     | 35.06078      | 10.43365       |

|            | <b>5-(3'-hydroxyphenyl)-<math>\gamma</math>-VL-4'-sulfate</b> |              |              |              |               |                |
|------------|---------------------------------------------------------------|--------------|--------------|--------------|---------------|----------------|
|            | <b>0-1 H</b>                                                  | <b>1-2 H</b> | <b>2-4 H</b> | <b>4-6 H</b> | <b>6-12 H</b> | <b>12-24 H</b> |
| <b>S1</b>  | 0.02476                                                       | 0.218044     | 0.875363     | 7.36701      | 69.18813      | 1.382005       |
| <b>S2</b>  | 0.433188                                                      | 0.824707     | 4.077125     | 10.26854     | 43.08864      | 9.487121       |
| <b>S3</b>  | 2.389781                                                      | 2.513285     | 2.566494     | 35.3891      | 87.89143      | 37.29121       |
| <b>S4</b>  | 0.197995                                                      | 1.179064     | 38.33872     | 33.60361     | 83.63832      | 17.58936       |
| <b>S5</b>  | 0.169905                                                      | 0.230921     | 8.083883     | 34.19901     | 57.88222      | 3.727891       |
| <b>S6</b>  | 0.003048                                                      | 0.059827     | 0.346346     | 2.269014     | 14.94503      | 22.58768       |
| <b>S7</b>  | 0.006197                                                      | 0.3072       | 3.719        | 4.128896     | 30.55488      | 19.07525       |
| <b>S8</b>  | 0.270251                                                      | 0.13424      | 0.338459     | 6.013964     | 63.36023      | 21.8509        |
| <b>S9</b>  | 0.250094                                                      | 0.723092     | 9.021644     | 28.72569     | 108.4844      | 44.84253       |
| <b>S10</b> | 0.561869                                                      | 0.148446     | 1.060775     | 3.383349     | 38.68688      | 22.3959        |
| <b>S11</b> | 0.084806                                                      | 8.47762      | 0.835449     | 2.26336      | 13.54982      | 6.195584       |

|            | <b>5-phenyl-<math>\gamma</math>-VL-3'-glucuronide</b> |              |              |              |               |                |
|------------|-------------------------------------------------------|--------------|--------------|--------------|---------------|----------------|
|            | <b>0-1 H</b>                                          | <b>1-2 H</b> | <b>2-4 H</b> | <b>4-6 H</b> | <b>6-12 H</b> | <b>12-24 H</b> |
| <b>S1</b>  | 0.001964                                              | 0.002332     | 0.004603     | 0.007364     | 0.019516      | 0.012213       |
| <b>S2</b>  | 0.001289                                              | 0.003191     | 0.003498     | 0.004787     | 0.009819      | 0.014361       |
| <b>S3</b>  | 0.00043                                               | 0.001191     | 0.005155     | 0.003314     | 0.01031       | 0.008039       |
| <b>S4</b>  | 0.001718                                              | 0.001964     | 3.020332     | 0.976824     | 0.23856       | 0.017552       |
| <b>S5</b>  | 0.005769                                              | 0.006505     | 0.008715     | 0.38076      | 0.011722      | 0.00896        |
| <b>S6</b>  | 0.002823                                              | 0.003559     | 0.005401     | 0.005401     | 0.010678      | 3.674319       |
| <b>S7</b>  | 0.000589                                              | 0.003928     | 0.006812     | 0.005216     | 0.011783      | 0.009574       |
| <b>S8</b>  | 0.00178                                               | 0.002455     | 0.007487     | 0.0027       | 0.01301       | 0.017552       |
| <b>S9</b>  | 0.003191                                              | 0.003253     | 0.093645     | 0.553014     | 3.159665      | 2.46089        |
| <b>S10</b> | 0.00135                                               | 0.003314     | 0.006137     | 0.002087     | 2.321258      | 0.424995       |
| <b>S11</b> | 0.036309                                              | 0.2769       | 0.496619     | 2.922992     | 19.62698      | 2.240441       |

|            | <b>5-(hydroxyphenyl)-<math>\gamma</math>-VL-glucuronide (3', 4' isomer)</b> |              |              |              |               |                |
|------------|-----------------------------------------------------------------------------|--------------|--------------|--------------|---------------|----------------|
|            | <b>0-1 H</b>                                                                | <b>1-2 H</b> | <b>2-4 H</b> | <b>4-6 H</b> | <b>6-12 H</b> | <b>12-24 H</b> |
| <b>S1</b>  | 0.001031                                                                    | 0.001224     | 0.002416     | 1.40919      | 18.12369      | 0.006411       |
| <b>S2</b>  | 0.032314                                                                    | 0.001675     | 0.915221     | 4.984805     | 16.04832      | 1.830641       |
| <b>S3</b>  | 0.524528                                                                    | 0.451734     | 0.402675     | 22.59619     | 59.57633      | 9.613632       |
| <b>S4</b>  | 0.089586                                                                    | 0.167208     | 55.3492      | 56.06874     | 60.7852       | 1.936506       |
| <b>S5</b>  | 0.003028                                                                    | 0.003415     | 4.287868     | 39.34235     | 39.9838       | 0.004703       |
| <b>S6</b>  | 0.001482                                                                    | 0.001868     | 0.002835     | 0.002835     | 2.451617      | 7.498286       |
| <b>S7</b>  | 0.000309                                                                    | 0.002062     | 0.298895     | 0.458979     | 3.069216      | 0.989859       |
| <b>S8</b>  | 0.000934                                                                    | 0.001289     | 0.00393      | 1.734337     | 70.63951      | 9.064842       |
| <b>S9</b>  | 0.001675                                                                    | 0.001707     | 4.811635     | 52.34109     | 178.57        | 39.86912       |
| <b>S10</b> | 0.043115                                                                    | 0.00174      | 0.003222     | 0.383571     | 12.99443      | 3.183838       |
| <b>S11</b> | 0.002513                                                                    | 4.19602      | 0.004703     | 0.235264     | 2.34657       | 0.122741       |

|            | <b>5-phenyl-<math>\gamma</math>-VL-methoxy-sulfate (1)</b> |              |              |              |               |                |
|------------|------------------------------------------------------------|--------------|--------------|--------------|---------------|----------------|
|            | <b>0-1 H</b>                                               | <b>1-2 H</b> | <b>2-4 H</b> | <b>4-6 H</b> | <b>6-12 H</b> | <b>12-24 H</b> |
| <b>S1</b>  | 0.00019                                                    | 0.000226     | 0.036388     | 0.060405     | 0.211891      | 0.001183       |
| <b>S2</b>  | 0.010092                                                   | 0.025077     | 0.030156     | 0.045002     | 0.109692      | 0.117977       |
| <b>S3</b>  | 0.006061                                                   | 0.010872     | 0.043145     | 0.071688     | 0.211798      | 0.120101       |
| <b>S4</b>  | 0.014827                                                   | 0.01575      | 0.088939     | 0.064769     | 0.189576      | 0.146875       |
| <b>S5</b>  | 0.045186                                                   | 0.00063      | 0.071593     | 0.063559     | 0.138642      | 0.072828       |
| <b>S6</b>  | 0.000273                                                   | 0.000345     | 0.000523     | 0.041961     | 0.085895      | 0.105492       |
| <b>S7</b>  | 5.71E-05                                                   | 0.00038      | 0.055356     | 0.0428       | 0.100771      | 0.08612        |
| <b>S8</b>  | 0.013857                                                   | 0.000238     | 0.000725     | 0.023727     | 0.16368       | 0.154805       |
| <b>S9</b>  | 0.000309                                                   | 0.025398     | 0.050381     | 0.058743     | 0.180073      | 0.124164       |
| <b>S10</b> | 0.010747                                                   | 0.000321     | 0.000595     | 0.016431     | 0.154535      | 0.154933       |
| <b>S11</b> | 0.000464                                                   | 0.046526     | 0.070069     | 0.031141     | 0.135533      | 0.103944       |

|            | <b>5-phenyl-<math>\gamma</math>-VL-methoxy-sulfate (2)</b> |              |              |              |               |                |
|------------|------------------------------------------------------------|--------------|--------------|--------------|---------------|----------------|
|            | <b>0-1 H</b>                                               | <b>1-2 H</b> | <b>2-4 H</b> | <b>4-6 H</b> | <b>6-12 H</b> | <b>12-24 H</b> |
| <b>S1</b>  | 0.015576                                                   | 0.000226     | 0.037539     | 0.076671     | 0.365271      | 0.095734       |
| <b>S2</b>  | 0.010609                                                   | 0.025258     | 0.040604     | 0.081333     | 0.283852      | 0.150228       |
| <b>S3</b>  | 0.008639                                                   | 0.016461     | 0.047737     | 0.179906     | 0.594649      | 0.265678       |
| <b>S4</b>  | 0.013559                                                   | 0.015732     | 0.202006     | 0.148295     | 0.429664      | 0.188145       |
| <b>S5</b>  | 0.000559                                                   | 0.00063      | 0.106283     | 0.216948     | 0.418132      | 0.094239       |
| <b>S6</b>  | 0.000273                                                   | 0.028104     | 0.000523     | 0.045298     | 0.107036      | 0.148069       |
| <b>S7</b>  | 5.71E-05                                                   | 0.00038      | 0.053336     | 0.044194     | 0.126662      | 0.108861       |
| <b>S8</b>  | 0.013826                                                   | 0.000238     | 0.000725     | 0.031477     | 0.329464      | 0.196975       |
| <b>S9</b>  | 0.024808                                                   | 0.025893     | 0.056388     | 0.166272     | 0.664131      | 0.364758       |
| <b>S10</b> | 0.011477                                                   | 0.025893     | 0.049018     | 0.027363     | 0.203094      | 0.187993       |
| <b>S11</b> | 0.000464                                                   | 0.053128     | 0.000868     | 0.035752     | 0.162196      | 0.109163       |

|            | <b>5-phenyl-<math>\gamma</math>-VL-methoxy-glucuronide</b> |              |              |              |               |                |
|------------|------------------------------------------------------------|--------------|--------------|--------------|---------------|----------------|
|            | <b>0-1 H</b>                                               | <b>1-2 H</b> | <b>2-4 H</b> | <b>4-6 H</b> | <b>6-12 H</b> | <b>12-24 H</b> |
| <b>S1</b>  | 0.017907                                                   | 0.001224     | 0.043238     | 0.06711      | 0.559736      | 0.118012       |
| <b>S2</b>  | 0.016287                                                   | 0.027196     | 0.030553     | 0.132337     | 0.292064      | 0.119141       |
| <b>S3</b>  | 0.011719                                                   | 0.016302     | 0.002706     | 0.171808     | 0.458543      | 0.140894       |
| <b>S4</b>  | 0.038979                                                   | 0.019275     | 0.360696     | 0.207036     | 0.374808      | 0.177713       |
| <b>S5</b>  | 0.003028                                                   | 0.003415     | 0.094998     | 0.266055     | 0.346121      | 0.097867       |
| <b>S6</b>  | 0.022848                                                   | 0.001868     | 0.002835     | 0.044878     | 0.121204      | 0.104871       |
| <b>S7</b>  | 0.007217                                                   | 0.002062     | 0.06153      | 0.002738     | 0.190003      | 0.122581       |
| <b>S8</b>  | 0.046355                                                   | 0.026933     | 0.00393      | 0.060273     | 0.727944      | 0.207343       |
| <b>S9</b>  | 0.026031                                                   | 0.001707     | 0.279299     | 0.23473      | 0.97854       | 0.442066       |
| <b>S10</b> | 0.22628                                                    | 0.079542     | 0.166948     | 0.173655     | 0.379391      | 0.378929       |
| <b>S11</b> | 0.03736                                                    | 0.219008     | 0.004703     | 0.038074     | 0.008698      | 0.117187       |

|            | <b>5-phenyl-<math>\gamma</math>-VL-sulfate-glucuronide</b> |              |              |              |               |                |
|------------|------------------------------------------------------------|--------------|--------------|--------------|---------------|----------------|
|            | <b>0-1 H</b>                                               | <b>1-2 H</b> | <b>2-4 H</b> | <b>4-6 H</b> | <b>6-12 H</b> | <b>12-24 H</b> |
| <b>S1</b>  | 0.001031                                                   | 0.02268      | 0.047154     | 0.311391     | 4.984531      | 0.142021       |
| <b>S2</b>  | 0.02851                                                    | 0.03095      | 0.177193     | 0.764917     | 4.978764      | 0.847724       |
| <b>S3</b>  | 0.23553                                                    | 0.155001     | 0.12365      | 1.029977     | 6.872132      | 3.879614       |
| <b>S4</b>  | 0.022404                                                   | 0.051838     | 3.810523     | 7.499738     | 18.10053      | 4.435338       |
| <b>S5</b>  | 0.050762                                                   | 0.003415     | 0.350744     | 2.502551     | 7.160838      | 0.599538       |
| <b>S6</b>  | 0.001482                                                   | 0.035132     | 0.043496     | 0.249407     | 2.190234      | 4.348229       |
| <b>S7</b>  | 0.000309                                                   | 0.002062     | 0.160892     | 0.285536     | 2.883341      | 2.156298       |
| <b>S8</b>  | 0.019026                                                   | 0.019218     | 0.08228      | 0.359855     | 6.050061      | 3.042189       |
| <b>S9</b>  | 0.026663                                                   | 0.051125     | 0.849024     | 3.184713     | 17.86215      | 8.934781       |
| <b>S10</b> | 0.034613                                                   | 0.033988     | 0.056788     | 0.192339     | 1.643909      | 1.133559       |
| <b>S11</b> | 0.043097                                                   | 0.961322     | 0.094896     | 0.186642     | 1.369184      | 0.543123       |

|            | <b>4-hydroxy-5-(hydroxyphenyl)-VA-sulfate</b> |              |              |              |               |                |
|------------|-----------------------------------------------|--------------|--------------|--------------|---------------|----------------|
|            | <b>0-1 H</b>                                  | <b>1-2 H</b> | <b>2-4 H</b> | <b>4-6 H</b> | <b>6-12 H</b> | <b>12-24 H</b> |
| <b>S1</b>  | 0.00019                                       | 0.000226     | 0.000446     | 0.000713     | 4.666094      | 0.001183       |
| <b>S2</b>  | 0.000125                                      | 0.000309     | 0.000339     | 0.000464     | 0.000951      | 0.001391       |
| <b>S3</b>  | 0.182602                                      | 0.15471      | 0.000499     | 1.546209     | 5.576214      | 3.142657       |
| <b>S4</b>  | 0.000166                                      | 0.00019      | 0.000666     | 4.30416      | 0.001902      | 1.830615       |
| <b>S5</b>  | 0.000559                                      | 0.00063      | 0.000844     | 2.063894     | 0.001135      | 0.000868       |
| <b>S6</b>  | 0.000273                                      | 0.000345     | 0.000523     | 0.000523     | 0.637188      | 1.210109       |
| <b>S7</b>  | 5.71E-05                                      | 0.00038      | 0.00066      | 0.000505     | 0.001141      | 1.815021       |
| <b>S8</b>  | 0.000172                                      | 0.000238     | 0.000725     | 0.000262     | 5.20036       | 2.184254       |
| <b>S9</b>  | 0.010426                                      | 0.000315     | 0.000493     | 0.000499     | 7.163422      | 0.000874       |
| <b>S10</b> | 0.000131                                      | 0.000321     | 0.058025     | 0.000202     | 0.001605      | 0.001724       |
| <b>S11</b> | 0.000464                                      | 0.000476     | 0.000868     | 0.00038      | 0.292073      | 0.001266       |

|            | <b>4-hydroxy-5-phenyl-VA-methoxy-sulfate</b> |              |              |              |               |                |
|------------|----------------------------------------------|--------------|--------------|--------------|---------------|----------------|
|            | <b>0-1 H</b>                                 | <b>1-2 H</b> | <b>2-4 H</b> | <b>4-6 H</b> | <b>6-12 H</b> | <b>12-24 H</b> |
| <b>S1</b>  | 0.00019                                      | 0.000226     | 0.000446     | 0.000713     | 0.001891      | 0.001183       |
| <b>S2</b>  | 0.000125                                     | 0.000309     | 0.000339     | 0.000464     | 0.000951      | 0.001391       |
| <b>S3</b>  | 0.000777                                     | 0.000115     | 0.000499     | 0.004577     | 0.017472      | 0.013919       |
| <b>S4</b>  | 0.000166                                     | 0.00019      | 0.000666     | 0.000428     | 0.001902      | 0.0017         |
| <b>S5</b>  | 0.000559                                     | 0.00063      | 0.000844     | 0.005187     | 0.001135      | 0.000868       |
| <b>S6</b>  | 0.000273                                     | 0.000345     | 0.000523     | 0.000523     | 0.001034      | 0.001118       |
| <b>S7</b>  | 5.71E-05                                     | 0.00038      | 0.00066      | 0.000505     | 0.001141      | 0.011076       |
| <b>S8</b>  | 0.000172                                     | 0.000238     | 0.000725     | 0.000262     | 0.016218      | 0.0017         |
| <b>S9</b>  | 0.000309                                     | 0.000315     | 0.000493     | 0.000499     | 0.02192       | 0.000874       |
| <b>S10</b> | 0.000131                                     | 0.000321     | 0.000595     | 0.000202     | 0.001605      | 0.001724       |
| <b>S11</b> | 0.000464                                     | 0.000476     | 0.000868     | 0.00038      | 0.001605      | 0.001266       |

|            | <b>4-hydroxy-5-(hydroxyphenyl)-VA-glucuronide</b> |              |              |              |               |                |
|------------|---------------------------------------------------|--------------|--------------|--------------|---------------|----------------|
|            | <b>0-1 H</b>                                      | <b>1-2 H</b> | <b>2-4 H</b> | <b>4-6 H</b> | <b>6-12 H</b> | <b>12-24 H</b> |
| <b>S1</b>  | 0.001031                                          | 0.001224     | 0.002416     | 0.003866     | 0.010244      | 0.006411       |
| <b>S2</b>  | 0.000677                                          | 0.001675     | 0.001836     | 0.002513     | 0.005154      | 0.007538       |
| <b>S3</b>  | 0.000226                                          | 0.005936     | 0.002706     | 0.001931     | 0.104034      | 0.091242       |
| <b>S4</b>  | 0.000902                                          | 0.001031     | 0.003608     | 0.148464     | 0.010309      | 0.009213       |
| <b>S5</b>  | 0.003028                                          | 0.003415     | 0.004575     | 0.002448     | 0.006153      | 0.004703       |
| <b>S6</b>  | 0.001482                                          | 0.001868     | 0.002835     | 0.002835     | 0.19227       | 0.006056       |
| <b>S7</b>  | 0.000309                                          | 0.002062     | 0.003576     | 0.002738     | 0.006185      | 0.005026       |
| <b>S8</b>  | 0.000934                                          | 0.001289     | 0.017873     | 0.001417     | 0.00683       | 0.009213       |
| <b>S9</b>  | 0.001675                                          | 0.001707     | 0.002674     | 0.002706     | 0.004413      | 0.004736       |
| <b>S10</b> | 0.000709                                          | 0.00174      | 0.003222     | 0.001095     | 0.008698      | 0.009342       |
| <b>S11</b> | 0.002513                                          | 0.002577     | 0.004703     | 0.178592     | 0.367875      | 0.418758       |

**Table S4.** Peak areas of epicatechin phase II metabolites at different time points in urine of 11 study participants

| <b>Epicatechin sulfate</b> |              |              |              |              |               |                |
|----------------------------|--------------|--------------|--------------|--------------|---------------|----------------|
|                            | <b>0-1 H</b> | <b>1-2 H</b> | <b>2-4 H</b> | <b>4-6 H</b> | <b>6-12 H</b> | <b>12-24 H</b> |
| <b>S1</b>                  | 1326389      | 6729630      | 7627886      | 4545819      | 537949.1      | 115695.8       |
| <b>S2</b>                  | 2286928      | 4686064      | 4759275      | 2693558      | 522643.9      | 47355.99       |
| <b>S3</b>                  | 12001577     | 47765606     | 23652766     | 19061541     | 3626151       | 486581.6       |
| <b>S4</b>                  | 3381769      | 11963453     | 8665182      | 3894692      | 735901.3      | 225699.5       |
| <b>S5</b>                  | 203828.6     | 4514361      | 7777964      | 5027105      | 1117218       | 333298.3       |
| <b>S6</b>                  | 36209.58     | 13144646     | 15101821     | 11624780     | 2639002       | 364616         |
| <b>S7</b>                  | 7942834      | 10757225     | 11869435     | 9368591      | 3299.233      | 111671.6       |
| <b>S8</b>                  | 366346.4     | 8557358      | 11639119     | 10917464     | 980372.2      | 87007.98       |
| <b>S9</b>                  | 286249.8     | 5551614      | 12297950     | 9452829      | 2835509       | 334020.5       |
| <b>S10</b>                 | 1457951      | 6334921      | 13595429     | 14717488     | 878015.3      | 143436.4       |
| <b>S11</b>                 | 872249.3     | 6761057      | 10234210     | 8407972      | 1080709       | 218703.1       |

| <b>Epicatechin methoxy-sulfate</b> |              |              |              |              |               |                |
|------------------------------------|--------------|--------------|--------------|--------------|---------------|----------------|
|                                    | <b>0-1 H</b> | <b>1-2 H</b> | <b>2-4 H</b> | <b>4-6 H</b> | <b>6-12 H</b> | <b>12-24 H</b> |
| <b>S1</b>                          | 264155.2     | 1505928      | 1715618      | 756096.5     | 842118.3      | 155791.6       |
| <b>S2</b>                          | 515779.8     | 1604495      | 1794357      | 721462.2     | 1040562       | 113782.8       |
| <b>S3</b>                          | 2228138      | 8786534      | 5138701      | 4409302      | 1465165       | 99307.92       |
| <b>S4</b>                          | 690347.8     | 2486397      | 2201221      | 1080031      | 751369.8      | 196323.9       |
| <b>S5</b>                          | 241809.9     | 1220005      | 2273699      | 1693201      | 329099.7      | 379075.3       |
| <b>S6</b>                          | 95482.43     | 3308303      | 4418853      | 2910722      | 687244.1      | 197620.7       |
| <b>S7</b>                          | 1669724      | 2199023      | 2670830      | 1726327      | 62038.97      | 139673.9       |
| <b>S8</b>                          | 423632.2     | 1720478      | 2936943      | 2295600      | 405058        | 364021.1       |
| <b>S9</b>                          | 418943.1     | 1388609      | 3588964      | 3329649      | 865319        | 352424         |
| <b>S10</b>                         | 447708.8     | 1596924      | 3185476      | 3001613      | 268254.5      | 273954.2       |
| <b>S11</b>                         | 245223.5     | 1957469      | 2759612      | 2162724      | 478304.9      | 410378.1       |

| <b>Epicatechin glucuronide</b> |              |              |              |              |               |                |
|--------------------------------|--------------|--------------|--------------|--------------|---------------|----------------|
|                                | <b>0-1 H</b> | <b>1-2 H</b> | <b>2-4 H</b> | <b>4-6 H</b> | <b>6-12 H</b> | <b>12-24 H</b> |
| <b>S1</b>                      | 202881.9     | 1629378      | 2359769      | 1499848      | 309913.7      | 77646.22       |
| <b>S2</b>                      | 228722.1     | 633382.3     | 743255.2     | 528876.8     | 174653.8      | 0              |
| <b>S3</b>                      | 1558598      | 5973485      | 3321729      | 4855303      | 1043087       | 139266.5       |
| <b>S4</b>                      | 399656       | 1849520      | 1877834      | 1034390      | 225865.7      | 52267.37       |
| <b>S5</b>                      | 17571.76     | 623071       | 1121546      | 1151800      | 243468.1      | 70097.7        |
| <b>S6</b>                      | 5260.954     | 2847977      | 3788255      | 3382646      | 1297641       | 301090.7       |
| <b>S7</b>                      | 668327.6     | 1157062      | 1566698      | 1297940      | 0             | 43100.36       |
| <b>S8</b>                      | 76165.32     | 2498802      | 4169011      | 6193930      | 986075        | 149360.9       |
| <b>S9</b>                      | 14363.95     | 1822636      | 5357244      | 5290114      | 2265415       | 211945         |
| <b>S10</b>                     | 350289.2     | 1848168      | 3813223      | 4550370      | 442151.6      | 96873.25       |
| <b>S11</b>                     | 151091.6     | 1443595      | 1762950      | 2093796      | 475948.4      | 117135.1       |

| <b>Epicatechin methoxy-glucuronide</b> |              |              |              |              |               |                |
|----------------------------------------|--------------|--------------|--------------|--------------|---------------|----------------|
|                                        | <b>0-1 H</b> | <b>1-2 H</b> | <b>2-4 H</b> | <b>4-6 H</b> | <b>6-12 H</b> | <b>12-24 H</b> |
| <b>S1</b>                              | 53325.73     | 187265.3     | 410527.9     | 263698.4     | 44379.53      | 3334.106       |
| <b>S2</b>                              | 57420.7      | 144792.3     | 174158.7     | 143130.9     | 64053.84      | 5234.604       |
| <b>S3</b>                              | 206971.1     | 642872.9     | 545616.8     | 606339.6     | 139712.8      | 8155.154       |
| <b>S4</b>                              | 79783.13     | 256745.1     | 235160.9     | 202879.7     | 49920.92      | 9343.942       |
| <b>S5</b>                              | 7575.494     | 75754.94     | 174440.7     | 197368.9     | 35440.03      | 2925.878       |
| <b>S6</b>                              | 42551.95     | 425519.5     | 732121.4     | 698675.9     | 286720.2      | 157462.7       |
| <b>S7</b>                              | 91762.97     | 124026.5     | 226577.2     | 226080.1     | 0             | 47443.82       |
| <b>S8</b>                              | 11057.8      | 370447.6     | 764561.8     | 953267.9     | 289455.2      | 106957.7       |
| <b>S9</b>                              | 12971.22     | 320977.4     | 917894.5     | 967904.3     | 445749.4      | 101725.8       |
| <b>S10</b>                             | 62764.87     | 269044.5     | 527606.6     | 627855.8     | 122608.4      | 32897.62       |
| <b>S11</b>                             | 27498.78     | 232632.1     | 371709.3     | 431238.5     | 160841        | 91763.81       |



**Table S5.** Composition of the Keto-Drink. Ingredients: water, rapeseed oil, pea protein, dietary fibre: corn dextrin, medium-chain triglycerides (MCT), calcium phosphate, magnesium hydroxide, chromium chloride, ferrous gluconate, potassium chloride, potassium iodate, potassium lactate, copper gluconate, manganese sulphate, sodium selenate, zinc gluconate, sodium L-ascorbate, D-biotin, cyanocobalamin, menaquinone, nicotinamide, calcium D-pantothenate, phyloquinone, folic acid, pyridoxine hydrochloride, retinyl acetate, riboflavin, DL-alpha tocopheryl acetate, cholecalciferol, vitamin E rich oil from palm fruit/annatto, choline tartrate, L-carnitine, maltodextrin, aroma, emulsifier: mono and diglycerides of edible fatty acids. Details on the composition of the Keto-Drink (neutral taste) are available online at the homepage of the manufacturer at: <https://www.keto-drink.de/en/keto-drink-neutral-taste/>

Nutrition Facts

| <b>Nutrients</b>                             | <b>per 100 ml</b> | <b>per drink (250 ml)</b> |
|----------------------------------------------|-------------------|---------------------------|
| <b>Energy</b>                                | 828 kJ            | 2,070 kJ                  |
| <b>Energy</b>                                | 200 kcal          | 500 kcal                  |
| <b>Fat</b>                                   | 16.8 g            | 42 g                      |
| <b>of which saturated fatty acids</b>        | 4.6 g             | 11.5 g                    |
| <b>of which mono-unsaturated fatty acids</b> | 8.5 g             | 21.25 g                   |
| <b>of which polyunsaturated fatty acids</b>  | 3.7 g             | 9.25 g                    |
| <b>Carbohydrate</b>                          | 1.6 g             | 4 g                       |
| <b>of which sugars</b>                       | 0.2 g             | 0.5 g                     |
| <b>Fibre</b>                                 | 3.1 g             | 7.75 g                    |
| <b>Protein</b>                               | 7.4 g             | 18.5 g                    |
| <b>Salt</b>                                  | 0.23 g            | 0.575 g                   |
| <b>Vitamins</b>                              | <b>per 100 ml</b> | <b>per drink (250 ml)</b> |
| <b>Vitamin A</b>                             | 174 µg            | 435 µg                    |
| <b>Vitamin D</b>                             | 4 µg              | 10 µg                     |
| <b>Vitamin E (α-tocopherol equivalent)</b>   | 7.1 mg            | 17.75 mg                  |
| of which tocopherols                         | 8.9 mg            | 22.25 mg                  |
| of which tocotrienols                        | 10.5 mg           | 26.25 mg                  |
| <b>Vitamin K</b>                             | 11.2 µg           | 28 µg                     |
| <b>Vitamin C</b>                             | 8.6 mg            | 21.5 mg                   |
| <b>Thiamin</b>                               | 0.2 mg            | 0.5 mg                    |
| <b>Riboflavin</b>                            | 0.2 mg            | 0.5 mg                    |
| <b>Niacin (NE)</b>                           | 2.6 mg            | 6.5 mg                    |
| <b>Vitamin B6</b>                            | 0.3 mg            | 0.75 mg                   |
| <b>Folic acid</b>                            | 44 µg             | 110 µg                    |
| <b>Vitamin B12</b>                           | 0.6 µg            | 1.5 µg                    |
| <b>Biotin</b>                                | 8.9 µg            | 22.25 µg                  |
| <b>Pantothenic acid</b>                      | 1.2 mg            | 3 mg                      |
| <b>Minerals</b>                              | <b>per 100 g</b>  | <b>per drink (250 ml)</b> |
| <b>Sodium</b>                                | 92 mg             | 230 mg                    |
| <b>Potassium</b>                             | 285 mg            | 712.5 mg                  |
| <b>Chloride</b>                              | 130 mg            | 325 mg                    |
| <b>Calcium</b>                               | 98 mg             | 245 mg                    |
| <b>Phosphorus</b>                            | 92 mg             | 230 mg                    |
| <b>Magnesium</b>                             | 28 mg             | 70 mg                     |
| <b>Iron</b>                                  | 3.4 mg            | 8.5 mg                    |
| <b>Zinc</b>                                  | 2.1 mg            | 5.25 mg                   |
| <b>Copper</b>                                | 210 µg            | 525 µg                    |
| <b>Manganese</b>                             | 0.3 mg            | 0.8 mg                    |
| <b>Selenium</b>                              | 15 µg             | 37.5 µg                   |
| <b>Chromium</b>                              | 9.2 µg            | 23 µg                     |
| <b>Molybdenum</b>                            | 11 µg             | 27.5 µg                   |
| <b>Iodine</b>                                | 48.0 µg           | 120 µg                    |
| <b>Other ingredients</b>                     | <b>per 100 ml</b> | <b>per drink (250 ml)</b> |
| <b>MCT-Fat</b>                               | 3.5 g             | 8.75 g                    |
| <b>Omega-3 fatty acid</b>                    | 1 g               | 2.5 g                     |
| <b>Omega-6 fatty acid</b>                    | 2.6 g             | 6.5 g                     |
| <b>Choline</b>                               | 81 mg             | 203 mg                    |
| <b>L-carnitine</b>                           | 40 mg             | 100 mg                    |
| <b>Lactate</b>                               | 1.3 g             | 3.25 g                    |

**Table S6.** Mass spectrometry characteristic of (epi)catechin metabolites in urine samples after apple intake. For each metabolite is reported a) retention time (min), b) the theoretical formula, molecular weight (MW) and the identification level, c) ESI polarity, d) *m/z* of molecular ion and fragments with their relative intensities, e) the annotation and f) the fragments obtained in MS/MS

| Metabolite                        | Rt (min) | Formula<br>MW<br>ID level                                                | ESI | <i>m/z</i> (relative intensity)                                                       | annotation                                                                 | MS/MS fragments                                                                                                                                                                                                                                                                                               |
|-----------------------------------|----------|--------------------------------------------------------------------------|-----|---------------------------------------------------------------------------------------|----------------------------------------------------------------------------|---------------------------------------------------------------------------------------------------------------------------------------------------------------------------------------------------------------------------------------------------------------------------------------------------------------|
| (Epi)catechin-glucuronide         | 4.48     | C <sub>21</sub> H <sub>22</sub> O <sub>12</sub><br>466.1111<br>Level II  | neg | <b>465.1007(100)</b><br>466.1046(11)<br>467.1094(1.3)<br>487.0824(30)<br>289.0700(15) | [M-H] <sup>-</sup><br><br>[M-2H+Na] <sup>-</sup><br>[M-H-GLC] <sup>-</sup> | <b>MS/MS<sup>2</sup> 465:</b> 289.0706(100) [M-H-GLC] <sup>-</sup><br>327.0708(7) [M-H-C <sub>7</sub> H <sub>7</sub> O <sub>3</sub> ] <sup>-</sup><br>245.0806(5)[M-H-GLC-CO <sub>2</sub> ] <sup>-</sup><br>179.0346 (2)<br><b>MS/MS<sup>2</sup> 289:</b> 245.0818(100)                                       |
| (Epi)catechin-sulfate             | 4.71     | C <sub>15</sub> H <sub>13</sub> O <sub>9</sub> S<br>369.0280<br>Level II | neg | <b>369.0278(100)</b><br>370.0312(18)<br>371.0278(9)                                   | [M-H] <sup>-</sup>                                                         | <b>MS/MS<sup>2</sup> 369:</b> 289.0707(100) [M-H-SULF] <sup>-</sup><br>230.9963(65) [M-H-C <sub>7</sub> H <sub>5</sub> O <sub>3</sub> ] <sup>-</sup><br>216.9801(10) [M-H-C <sub>8</sub> H <sub>7</sub> O <sub>3</sub> ] <sup>-</sup><br>245.0812(10) [M-H-SULF-CO <sub>2</sub> ] <sup>-</sup>                |
| (Epi)catechin-methoxy glucuronide | 4.86     | C <sub>22</sub> H <sub>24</sub> O <sub>12</sub><br>480.1268<br>Level II  | neg | <b>479.1159(100)</b><br>480.1168(14)<br>481.1202(2)                                   | [M-H] <sup>-</sup>                                                         | <b>MS/MS<sup>2</sup> 479:</b> 303.0851(100) [M-H-GLC]<br>313.0536(50) [M-H- C <sub>9</sub> H <sub>10</sub> O <sub>3</sub> ] <sup>-</sup>                                                                                                                                                                      |
|                                   |          |                                                                          | pos | 481.1317(100)<br>482.1351(10)                                                         | [M+H] <sup>+</sup>                                                         |                                                                                                                                                                                                                                                                                                               |
| (Epi)catechin-methoxy sulfate     | 5.25     | C <sub>16</sub> H <sub>16</sub> O <sub>9</sub> S<br>384.0515<br>Level II | neg | <b>383.0438(100)</b><br>384.0469(21)<br>385.0436(9)                                   | [M-H] <sup>-</sup>                                                         | <b>MS/MS<sup>2</sup> 383:</b> 303.0863(100) [M-H-SO <sub>3</sub> ] <sup>-</sup><br>216.9807(61) [M-H-C <sub>9</sub> H <sub>10</sub> O <sub>3</sub> ] <sup>-</sup><br>137.0242 (38) [M-H-C <sub>9</sub> H <sub>10</sub> O <sub>6</sub> S] <sup>-</sup><br>285.0750(6) [M-H-SULF-H <sub>2</sub> O] <sup>-</sup> |

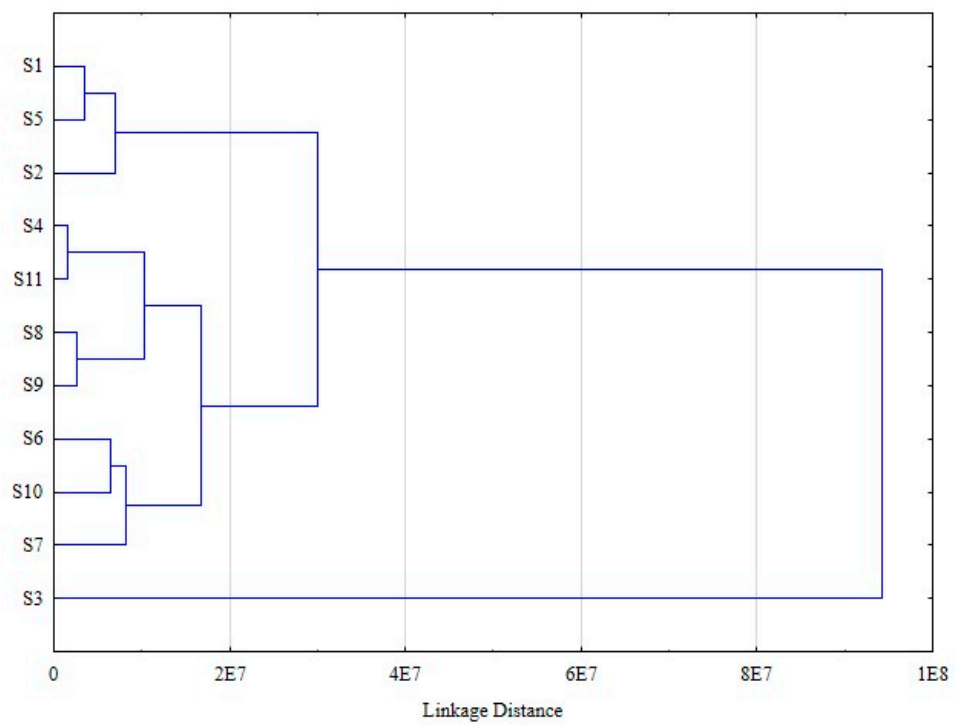

**Figure S1:** Cluster analysis based on percentages of excreted epicatechin phase II metabolites in the 11 subjects (complete linkage, Euclidean distance)
